1 **A large-scale whole-genome sequencing analysis reveals highly specific genome**  
2 **editing by both Cas9 and Cpf1 nucleases in rice**

3 Xu Tang<sup>1†</sup>, Guanqing Liu<sup>2,3†</sup>, Jianping Zhou<sup>1†</sup>, Qiurong Ren<sup>1</sup>, Qi You<sup>2,3</sup>, Li Tian<sup>1</sup>, Xuhui  
4 Xin<sup>1</sup>, Zhaohui Zhong<sup>1</sup>, Binglin Liu<sup>1</sup>, Xuelian Zheng<sup>1</sup>, Dengwei Zhang<sup>1</sup>, Aimee Malzahn<sup>4</sup>,  
5 Zhiyun Gong<sup>2</sup>, Yiping Qi<sup>4,5\*</sup>, Tao Zhang<sup>2,3\*</sup>, Yong Zhang<sup>1\*</sup>

6 <sup>1</sup>Department of Biotechnology, School of Life Sciences and Technology, Center for  
7 Informational Biology, University of Electronic Science and Technology of China,  
8 Chengdu 610054, China; <sup>2</sup>Jiangsu Key Laboratory of Crop Genetics and Physiology, Co-  
9 Innovation Center for Modern Production Technology of Grain Crops, Key Laboratory of  
10 Plant Functional Genomics of the Ministry of Education, Yangzhou University, Yangzhou  
11 225009, China; <sup>3</sup>Joint International Research Laboratory of Agriculture and Agri-Product  
12 Safety of Ministry of Education of China, Yangzhou University, Yangzhou 225009, China;  
13 <sup>4</sup>Department of Plant Science and Landscape Architecture, University of Maryland,  
14 College Park, Maryland 20742, USA; <sup>5</sup>Institute for Bioscience and Biotechnology  
15 Research, University of Maryland, Rockville, Maryland 20850;

16

17 † These authors contributed equally to this work.

18

19 **Running title: WGS analysis of Cas9 and Cpf1 off-targeting in rice**

20

21 **\*Corresponding authors:**

22 Yiping Qi, Department of Plant Science and Landscape Architecture, University of  
23 Maryland, College Park, MD 20742, USA; Email: [Yiping@umd.edu](mailto:Yiping@umd.edu)

24

25 Tao Zhang, Jiangsu Key Laboratory of Crop Genetics and Physiology, Co-Innovation  
26 Center for Modern Production Technology of Grain Crops, Key Laboratory of Plant  
27 Functional Genomics of the Ministry of Education, Yangzhou University, Yangzhou  
28 225009, China; Email: [zhangtao@yzu.edu.cn](mailto:zhangtao@yzu.edu.cn)

29 Yong Zhang, Department of Biotechnology, School of Life Sciences and Technology,  
30 Center for Informational Biology, University of Electronic Science and Technology of  
31 China, Room 216, Main Building, No. 4, Section 2, North Jianshe Road, Chengdu,  
32 610054, P.R. China; Email: [zhangyong916@uestc.edu.cn](mailto:zhangyong916@uestc.edu.cn)

33

34 **Targeting specificity has been an essential issue for applying genome editing**  
35 **systems in functional genomics, precise medicine and plant breeding.**  
36 **Understanding the scope of off-target mutations in Cas9 or Cpf1-edited crops is**  
37 **critical for research and regulation. In plants, only limited studies had used whole-**  
38 **genome sequencing (WGS) to test off-target effects of Cas9. However, the cause**  
39 **of numerous discovered mutations is still controversial. Furthermore, WGS based**  
40 **off-target analysis of Cpf1 has not been reported in any higher organism to date.**  
41 **Here, we conducted a WGS analysis of 34 plants edited by Cas9 and 15 plants**  
42 **edited by Cpf1 in T0 and T1 generations along with 20 diverse control plants in rice,**  
43 **a major food crop with a genome size of ~380 Mb. The sequencing depth ranged**  
44 **from 45X to 105X with reads mapping rate above 96%. Our results clearly show that**  
45 **most mutations in edited plants were created by tissue culture process, which**  
46 **caused ~102 to 148 single nucleotide variations (SNVs) and ~32 to 83**  
47 **insertions/deletions (indels) per plant. Among 12 Cas9 single guide RNAs (sgRNAs)**  
48 **and 3 Cpf1 CRISPR RNAs (crRNAs) assessed by WGS, only one Cas9 sgRNA**  
49 **resulted in off-target mutations in T0 lines at sites predicted by computer programs.**  
50 **Moreover, we cannot find evidence for bona fide off-target mutations due to**  
51 **continued expression of Cas9 or Cpf1 with guide RNAs in T1 generation. Taken**  
52 **together, our comprehensive and rigorous analysis of WGS big data across**  
53 **multiple sample types suggests both Cas9 and Cpf1 nucleases are very specific in**  
54 **generating targeted DNA modifications and off-targeting can be avoided by**  
55 **designing guide RNAs with high specificity.**

56 Bacterial type II CRISPR-Cas9 systems can effectively induce RNA-guided DNA  
57 double strand breaks (DSBs)<sup>1</sup>, making them popular tools for genome editing in bacteria<sup>2</sup>,  
58 animal cells<sup>3</sup>, mammalian systems<sup>4-7</sup> and plants<sup>8-11</sup>. The most widely used *Streptococcus*

59 *pyogenes* Cas9 (SpCas9) uses ~20 nucleotides (nt) of a single guide RNA (sgRNA) to  
60 recognize a complementary target DNA site along with an NGG protospacer adjacent  
61 motif (PAM)<sup>1, 12</sup>. More recently, type V CRISPR-Cpf1 was shown to mediate efficient  
62 genome editing in human cells<sup>13</sup> and plants<sup>14, 15</sup>. Cpf1 uses ~23 nt of an RNA guide to  
63 target DNA with a TTTV PAM<sup>13</sup>. RNA-guided nucleases (RGNs) such as Cas9 and Cpf1  
64 represent versatile genome editing tools that promise to advance basic science, enable  
65 personalized medicine and accelerate crop breeding. However, Cas9 may cause  
66 undesired off-target mutations due to sgRNAs recognizing DNA sequences with one to a  
67 few nucleotide mismatches; albeit with reduced nuclease binding and cleavage activity<sup>1,</sup>  
68 <sup>6, 16, 17</sup>. Although similar rules apply to Cpf1, recent studies in human cells<sup>18, 19</sup> have shown  
69 Cpf1 is generally more specific than Cas9.

70 Understanding the scope of off-target mutations in Cas9 or Cpf1-edited crops is  
71 critical for research and regulation. Previously, whole-genome sequencing (WGS) was  
72 applied for detecting off-target mutations by Cas9 in *Arabidopsis*<sup>20</sup>, rice<sup>21</sup> and tomato<sup>22</sup>.  
73 Unfortunately, these studies either only looked at potential off-target sites predicted by  
74 computer programs or fell short of full analysis of all the mutations identified by WGS in  
75 edited plants. Without inclusion of enough necessary controls, such WGS studies had  
76 limited power for isolating off-target mutations in edited plants because they were unable  
77 to fully assess the levels of preexisting mutations, spontaneous mutations, and mutations  
78 caused by tissue culture and *Agrobacterium* mediated transformation. Genome-wide  
79 identification of off-target mutations by Cas9 or Cpf1 will be empowered only if all these  
80 background mutations can be isolated. Furthermore, WGS based off-target analysis of  
81 Cpf1 has not been reported in any higher organism. In recent years, WGS studies on  
82 Cas9-edited mice have generated contrasting results; one study found few off-target  
83 mutations<sup>23</sup> while the other found many<sup>24</sup>. This controversy raised the urgency for  
84 comprehensive and rigorous analyses of off-target mutations using WGS in edited  
85 animals and plants. We reasoned a large-scale and well-designed study is required for  
86 comprehensive assessment and comparison of off-target effects by Cas9 and Cpf1 in  
87 crops. Here, we describe a large-scale WGS study to assess off-target effects of Cas9  
88 and Cpf1 in rice, an important food crop. Our results suggest off-target effects of Cas9  
89 and Cpf1 are largely negligible when compared to spontaneous mutations or mutations

90 caused by tissue culture and *Agrobacterium* infection in edited plants. The resulting  
91 knowledge is likely to serve as an important reference for plant researchers and  
92 regulatory agencies.

93

## 94 **RESULTS**

### 95 **Detection of off-target, spontaneous and background mutations**

96 To comprehensively evaluate potential off-target effects of Cas9 in rice, we  
97 generated 10 T-DNA constructs to target 7 genes with 12 sgRNAs including two dual-  
98 sgRNA constructs for editing two circular RNA loci (**Supplementary Table 1**). All 10  
99 CRISPR-Cas9 nuclease expression constructs were active at target sites and resulted in  
100 editing frequencies ranging from 15% to 100% in T0 lines (**Fig. 1a, 1b and**  
101 **Supplementary Table 1**). For each Cas9 construct, two independent T0 plants carrying  
102 non-mosaic mutations (**Supplementary Fig. 1**) were chosen for WGS. To assess off-  
103 target effects of Cpf1, we followed three previously published *Lachnospiraceae bacterium*  
104 ND2006 Cpf1 (LbCpf1) targeting constructs that resulted in 100% editing efficiency in T0  
105 lines<sup>14</sup>. Two Cpf1 T0 plants per construct carrying non-mosaic on-target mutations were  
106 chosen for WGS (**Supplementary Fig. 2**). For four T0 lines edited by four different Cas9  
107 sgRNAs and two T0 lines edited by two different Cpf1 crRNAs, we selected two to five  
108 plants from each T0 line in the T1 generation for WGS (**Fig. 1a and 1b**). In addition, four  
109 wild type (WT) plants each from three consecutive generations were also included for  
110 WGS to survey spontaneous mutations (**Fig. 1b**). To ensure high confidence on base  
111 calling, all 69 individual plants were sequenced at 45X to 105X in depth (**Supplementary**  
112 **Table. 2**). A stringent mutation mapping and calling pipeline was developed for WGS  
113 analysis (**Fig. 1c**). Single-nucleotide variants (SNVs) and small insertions and deletions  
114 (indels) were each identified with three variant-calling software programs, with high-  
115 confident variants shared by all software being further analyzed for mutation identification  
116 (**Fig. 1c**).

117 To survey pre-existing mutations in the WT population and estimate the level of  
118 spontaneous mutations across generations, we analyzed the WGS data from 12 WT

119 plants across three consecutive generations (**Fig. 1b and Supplementary Fig. 3**) After  
120 filtering shared pre-existing mutations, we estimated an average of 23 SNVs and 18  
121 indels as spontaneous mutations from parents to progeny in rice (**Fig. 2a and 2b**). We  
122 calculated the spontaneous mutation rate at  $\sim 5.4 \times 10^{-8}$  per site per diploid genome per  
123 generation, which is in line with the rates previously reported in maize ( $2.2\text{-}3.9 \times 10^{-8}$ )<sup>25</sup> but  
124 higher than the rate in *Arabidopsis* ( $7\text{-}7.4 \times 10^{-9}$ )<sup>26, 27</sup>.

125 To assess mutations generated by tissue culture and *Agrobacterium* infection, we  
126 produced and sequenced four types of control plants: tissue culture only, tissue culture  
127 with *Agrobacterium*, tissue culture with *Agrobacterium* transformation of Cas9 without  
128 sgRNA, and tissue culture with *Agrobacterium* transformation of Cpf1 without crRNA (**Fig.**  
129 **1b and Supplementary Fig. 4**). Tissue culture is known to be mutagenic, causing  
130 somaclonal variations<sup>28</sup>. Indeed, the two tissue culture-only samples contained an  
131 average of 114 SNVs and 36 indels (**Fig. 2a and 2b**), resulting in a background mutation  
132 rate of  $1.86 \times 10^{-7}$ , which is similar to the rates ( $1.7\text{-}3.3 \times 10^{-7}$ ) previously published<sup>29</sup>.  
133 Importantly, similar numbers of SNVs were observed from *Agrobacterium*-infected or  
134 Cas9/Cpf1 backbone-transformed plants (**Fig. 2a**). These three controls generated  $\sim 15$   
135 to 41 more indels compared to tissue culture-only samples (**Fig. 2b**), suggesting  
136 *Agrobacterium* infection is mutagenic with a preference for introducing indels. This  
137 warrants further investigation as these three controls show large variations on indel  
138 counts. We mapped all identified mutations from these four control types to the rice  
139 genome across 12 chromosomes (**Supplementary Fig. 5**). Further analysis of the  
140 genome-wide distribution of these background mutations revealed high enrichment of  
141 SNVs in transposable elements (TE) and repeats (**Fig. 2c**), as well as high enrichment of  
142 indels in repeats (**Fig. 2d**).

### 143 **SNVs and indels identified in edited T0 plants are largely background mutations**

144 Whole-genome sequencing of 20 Cas9 and 6 Cpf1-edited T0 lines confirmed all  
145 target site mutations that were initially identified with Sanger sequencing  
146 (**Supplementary Table 1, Supplementary Fig. 1 and 2**). We identified SNVs and indels  
147 in these Cas9 T0 lines (**Supplementary Fig. 6**) and Cpf1 T0 lines (**Supplementary Fig.**  
148 **7**) and mapped these mutations to the rice genome (**Supplementary Fig. 5**). We found

149 their numbers are close to those in Cas9 or Cpf1 backbone controls, with about twice as  
150 many SNVs as indels (**Fig. 3a** and **3b**). This mutation pattern is not consistent with Cas9  
151 or Cpf1-generated mutations in rice which are largely indels<sup>9, 14</sup>. For example, all target  
152 site mutations in these selected 26 T0 lines are indels (**Supplementary Table 1**,  
153 **Supplementary Fig. 1 and 2**). The SNV and indel mutations in Cas9 and Cpf1-edited T0  
154 samples share similar genome-wide distribution with the tissue culture related controls  
155 (**Supplementary Fig. 5**). We identified a total of 31 T-DNA insertion events in 26 T0 lines  
156 and found T-DNA copy numbers ranging from 1 to 3; most T0 lines had only one T-DNA  
157 insertion (**Supplementary Fig. 8**). No significant difference was found for the numbers of  
158 SNVs and indels among T0 lines with different T-DNA copy numbers (**Fig. 3c** and **3d**).  
159 Cas9-J and Cas9-K T0 lines each expressed a dual-sgRNA construct for simultaneous  
160 expression of two sgRNAs, targeting two putative circle RNA genes (**Fig. 1a**). No  
161 significant difference was found for the numbers of SNVs and indels in these four dual-  
162 sgRNA lines and the other 22 single sgRNA lines (**Fig. 3e** and **3f**). Moreover, there is no  
163 correlation between the numbers of SNVs or indels and the on-target editing efficiency by  
164 Cas9 or Cpf1 in these T0 plants (**Fig. 3g** and **3h**). All these analyses strongly suggest  
165 mutations in these genome-edited T0 lines are mostly background mutations caused  
166 during tissue culture and *Agrobacterium* mediated transformation.

### 167 **Identification of true off-target mutations in T0 plants**

168 To identify true off-target mutations in the T0 plants, we first evaluated the  
169 specificity of 12 sgRNAs of Cas9 and 3 crRNAs of Cpf1 with CRISPOR<sup>30</sup> and Cas-  
170 OFFinder<sup>31</sup>. With a stringent criterion allowing only a 1 nt mismatch in the protospacer,  
171 three Cas9 sgRNAs (Cas9-D, Cas9-E and Cas9-J-sgRNA01) (**Fig. 1a**) had predicted off-  
172 target sites (**Fig. 4a** and **Supplementary Table 3**). When we mapped all identified  
173 mutations to these potential off-target sites by allowing up to 10 nt mismatches to the  
174 protospacers of Cas9 (**Supplementary Fig. 9**) and Cpf1 (**Supplementary Fig. 10**), only  
175 Cas9-J-sgRNA01 showed evidence of true off-targeting. It is worth noting that these off-  
176 target sites showed high sequence homology to the Cas9-J-sgRNA01 target site and  
177 could be accurately predicted by software such as CRISPOR and Cas-OFFinder  
178 (**Supplementary Table 3**). We reasoned true off-target mutations are likely to occur

179 separately in independent T0 lines. Indeed, among 12 off-target sites identified for Cas9-  
180 J-sgRNA01, seven sites were overlapped between two T0 lines while the remaining five  
181 sites were only validated from one T0 line (**Fig. 4b and 4c**). All 12 off-target sites show  
182 very high sequence homology with the target site (**Fig. 4c**). Among them, one site at  
183 Chr1:22043904 is technically an on-target site because it has the same 20-nt protospacer  
184 with 1-nt silent mismatch in the PAM (CGG vs TGG). For the remaining 11 true off-target  
185 sites, eight sites carry one mismatch mutation in the 20 nt protospacer. For the additional  
186 3 sites with two or three mismatch mutations, only one mutation is present in the 1-18 nt  
187 sequence from the PAM (**Fig. 4c**). Further analysis these 12 off-target sites found four  
188 have silent mutations in NGG PAM and one has a non-canonical CAG PAM, which was  
189 reported as an alternative PAM (NAG) for SpCas9 nuclease<sup>32</sup> and recently shown to  
190 mediate Cas9 activity in rice<sup>33</sup>. All mutations at these 12 sites were indels, and,  
191 importantly, the two Cas9-J T0 lines carried distinct alleles at these sites (**Fig. 4d and**  
192 **Supplementary Fig. 11**); validating these mutations were truly caused by Cas9.

193 Cas9-E sgRNA was predicted by CRISPOR and Cas-OFFinder to contain 6 off-  
194 target sites when up to a 3 nt mismatch was allowed (**Fig. 4a and Supplementary Table**  
195 **3**). However, no off-target mutations were found at these predicted sites. Although the  
196 two Cas9-E T0 lines shared seven SNVs and three indels (**Fig. 4b**), these 10 shared  
197 mutations had very poor sequence homology to the target site (**Fig. 4e**). Only five sites  
198 contained the NGG PAM. Among them, the site sharing highest sequence homology with  
199 the target site still contained a 10 nt mismatch, making it unlikely to be a true off-target  
200 site. Unlike indels found in Cas9-J samples, these putative off-target mutations are mostly  
201 SNVs (**Fig. 4b and f**). Furthermore, both independent T0 lines always carried the same  
202 mutant alleles (**Fig. 4f and Supplementary Fig. 11**). These observations suggest that  
203 the 10 shared mutations of two Cas9-E T0 lines were not caused by Cas9, but were pre-  
204 existing mutations from a parental line.

205 Cas9 was previously shown to induce off-target mutations at sites with missing or  
206 extra nucleotides when compared to the target site, which form bulges when targeted by  
207 guide RNAs<sup>34</sup>. To detect such off-target mutations, we extracted all T0 mutation site  
208 flanking sequences (25 bp upstream and downstream) and aligned them to

209 corresponding sgRNA/crRNA sequences using BLAST. Only Cas9-J1 and Cas9-J2  
210 samples had alignments to the Cas9-J-sgRNA01 target (15 in Cas9-J1 and 10 in Cas9-  
211 J2); other samples had no hit. None of the detected mutations were caused by bulge-  
212 forming DNA-sgRNA recognition. We also investigated whether DNA translocation events  
213 were induced by Cas9 or Cpf1 by searching for structural variants (SVs) and gene fusion  
214 events in the whole rice genome. We did not detect any translocation event in all T0 lines.  
215 Given the level of nuclease-induced DNA translocation can be used for assessing targeting  
216 specificity<sup>35</sup>, absence of detectable translocation events in all T0 samples here indicates  
217 these Cas9 and Cpf1 reagents are indeed very specific; limiting cleavage activity almost  
218 exclusively to the target sites.

### 219 **No evidence of off-target mutations in T1 plants**

220 Our analysis of T0 plants suggested 11 out of 12 Cas9 sgRNAs and all three Cpf1  
221 crRNAs are very specific as no off-target mutations were detected. However, lack of off-  
222 target mutations might be attributed to low expression or activity of Cas9 or Cpf1. It is  
223 also important to determine whether continued expression of the RGNs into the next  
224 generation will result in *de novo* off-target mutations. Therefore, we decided to sequence  
225 14 T1 plants from Cas9 T0 lines with diverse levels of on-target editing efficiency (15%,  
226 60%, 75% and 100%) at four target sites and 9 T1 plants from Cpf1 T0 lines at two target  
227 sites (**Fig. 1a, 1b** and **Supplementary Fig. 1**). Germline-transmitted on-target mutations  
228 in 14 Cas9 edited or 9 Cpf1 edited T1 lines were validated by Sanger sequencing  
229 (**Supplementary Fig. 12 and 13**). With WGS analysis, we identified all SNVs and indels  
230 in Cas9 T1 lines (**Supplementary Fig. 14**) and Cpf1 T1 lines (**Supplementary Fig. 15**).  
231 The GWS results confirmed the germline-transmitted on-target mutations  
232 (**Supplementary Table 1, Supplementary Fig. 12 and 13**). Among all other SNVs and  
233 indels, most of them were identified in the corresponding T0 lines, suggesting they have  
234 been fixed (**Supplementary Fig. 16**). For the other new mutations identified in T1 lines,  
235 the average number of SNVs ranged from 9 to 29 (**Fig. 5a**), while the average of indels  
236 ranged from 10 to 28 (**Fig. 5b**). Such spontaneous mutation rates are consistent with the  
237 spontaneous mutation rates we found earlier in WT samples (**Fig. 2a and 2b**), which are  
238 also in line with a previous study<sup>27</sup>.



239           These new mutations were mapped to the rice genome alongside with new  
240 mutations that were discovered in WT plants across two generations (**Supplementary**  
241 **Fig. 17**). The genome distribution of these new mutations in T1 lines also showed  
242 enrichment in repeats (**Supplementary Fig. 16**), consistent with the spontaneous  
243 mutations discovered in WT (**Fig. 2c and 2d**). Detailed analysis of SNVs among all  
244 sample types revealed T1 lines have higher rates of G:C>A:T transitions than T0 lines  
245 (**Supplementary Fig. 18**), consistent with the observation on spontaneous mutations in  
246 *Arabidopsis*<sup>26</sup>. Further analysis of T1 lines either with or without the Cas9 transgene did  
247 not reveal any difference on the numbers of new SNVs and indels among these two  
248 subpopulations (**Fig. 5c and d**). By applying similar methods from the analysis of T0  
249 plants, we were unable to identify any off-target mutations by Cas9 or Cpf1 in T1 lines.  
250 Given most T1 lines analyzed still carry the RGN constructs, our results suggest  
251 continued expression of Cas9 or Cpf1 constructs did not cause *de novo* off-target  
252 mutations in T1 lines.

253           To further assess the new mutations found in T1 lines, we calculated and  
254 compared the allele frequency of SNVs and indels among four groups: tissue culture  
255 controls, T0 plants, T1 plants, and WT (**Fig. 5e**). The tissue culture controls and  
256 Cas9/Cpf1 T0 lines share strikingly similar (mostly heterozygous-like) allele frequency  
257 distribution. This reiterates our earlier conclusion that all mutations in T0 samples (except  
258 a few found in Cas9-J samples) are background mutations. By contrast, T1 plants show  
259 more homozygous-like SNVs (0.75 to 1.0 in allele frequency) and somatic-like indels (0  
260 to 0.25 in allele frequency). This trend of rapidly fixing SNVs and the increase of somatic  
261 indels in T1 is interesting, and relatively in line with the observation in WT plants.

262

## 263 **Discussion**

264           Specificity of CRISPR-Cas RGN systems has caught more attentions in humans  
265 than in animals or plants, due to medicinal applications of RGNs. Earlier WGS studies in  
266 human cells found low incidence of off-target mutations by Cas9<sup>36, 37</sup>. Recently, two WGS  
267 off-target studies in mice showed conflicting results<sup>23, 24</sup>. However, the study that claimed  
268 unexpected large-scale off-target effects by Cas9 may be flawed due to limitations in its

269 experimental design and WGS data analysis<sup>24</sup>. Given the wide adoption of CRISPR-Cas  
270 systems in agriculture, with genome-edited crop products reaching market in record  
271 time<sup>38</sup>, it becomes urgent to conduct large-scale and exhaustive WGS analysis of off-  
272 target effects by Cas9 and Cpf1, two leading RGN systems, in agriculturally important  
273 crops. Such studies will help assess safety of Cas9 and Cpf1 in precise crop breeding as  
274 well as provide valuable information to scientists, breeders, regulators and consumers.

275 In this study, we conducted a large-scale WGS analysis for detecting potential off-  
276 target mutations caused by 12 Cas9 sgRNAs and 3 Cpf1 crRNAs in rice, an important  
277 food crop. We confirmed WGS-identified mutations by Sanger sequencing at randomly  
278 selected sites with a 100% success rate (**Supplementary Table 4**), which is consistent  
279 with the high quality of our WGS data. Our experimental design took into account  
280 background mutations caused by tissue culture and *Agrobacterium* mediated  
281 transformation, pre-existing mutations in parents and spontaneous mutations that arise  
282 from seed propagation. Through sequencing 20 control plants of different types and 49  
283 Cas9 or Cpf1-edited T0 and T1 plants, we only found true off-target mutations in two T0  
284 lines expressing Cas9 protein with Cas9-J-sgRNA01. Importantly, these empirically  
285 validated off-target sites can be readily predicted computationally. Our examination of T1  
286 plants that continue to carry Cas9-sgRNA or Cpf1-crRNA did not reveal off-target  
287 mutations, suggesting continued presence of the RGN reagents with varying activity in  
288 plants does not cause off-target mutations if the guide RNAs are well-designed for  
289 specificity. This observation is also highly significant because it encourages the use of  
290 Cas9 and Cpf1 in certain breeding applications that may require expression of RGNs  
291 across several generations. For example, a RGN cassette may be introduced from a  
292 transgenic line into a transformation-recalcitrant variety of the same plant species for  
293 genome editing with simple genetic crossing.

294 Our study also provided insights on avoiding off-target effects of Cas9 and Cpf1 in  
295 edited crops. To minimize off-target effects, many systems have been developed  
296 including paired Cas9 nickases<sup>39</sup>, high fidelity Cas9 proteins<sup>40-42</sup>, FokI-dCas9 fusions<sup>43,</sup>  
297 <sup>44</sup>, truncated sgRNAs<sup>45</sup>, and ribonucleotide protein (RNP) delivery<sup>46</sup>. To assess and  
298 identify off-target sites, *in vivo*<sup>17, 35</sup> and *in vitro*<sup>47-49</sup> tools have also been developed in  
299 human cells, which may be applied in plants. Our WGS analysis with wild type SpCas9

300 and LbCpf1 proteins did not find off-target mutations for 14 out of 15 guide RNAs tested  
301 in T0 and T1 plants, suggesting utilization of a high-fidelity enzyme, which are typically of  
302 lower activity, may be unnecessary in crop applications. When a mismatch up to 3 nt of  
303 the protospacer is allowed, Cas9-OFFinder programs predicted a total of 37 off-target  
304 sites for 7 out of 11 Cas9 sgRNAs. Yet, we couldn't detect any mutations at these putative  
305 off-target sites. Alternatively, Cas9-OFFinder predicted all the off-target sites that we  
306 identified for Cas9-J-sgRNA01; many of the sites have just 1 nt mismatch to the  
307 protospacer of the target site. Therefore, we can deduce a simple rule to alleviate off-  
308 target effects: making sure even the highest scored potential off-target sites will have at  
309 least a 2 nt mismatch to the seed sequence of the protospacer. We note this may not  
310 always be possible if the target sequence shares many homologous sequences in the  
311 genome. For example, maize has a very repetitive genome and wheat has A, B, D sub-  
312 genomes that share high similarity. In these cases, targeted amplicon sequencing using  
313 next generation sequencing technologies may be an appropriate and cost-effective  
314 method to look for off-target mutations.

315 Finally, we hope our data can be a valuable reference for regulatory agencies and  
316 other entities. It is reasonable and necessary to scrutinize any new technology for its  
317 efficacy and safety. Cas9 and Cpf1, as new crop breeding technologies, are no exception.  
318 Although Cas9 based off-target effects have been studied by WGS in plants<sup>20-22</sup>, our study  
319 differs from previous studies significantly at scale, depth and comprehensiveness. Our  
320 research also represents the first report of using WGS to assess off-targeting by Cpf1 in  
321 any edited higher eukaryotic organism. We could not find any off-target mutations in 47  
322 out of 49 rice plants edited by 11 Cas9-sgRNA and 3 Cpf1-crRNA constructs. This precise  
323 level of genome modification casts a stunning contrast to many conventional breeding  
324 technologies. For example, we found that even the safest breeding approach, harvesting  
325 seeds from parental lines, introduces ~30 to 50 spontaneous mutations into the next  
326 generation in rice. We also observed ~200 tissue culture-introduced somaclonal  
327 variations per rice plant, even though few are affecting coding sequences. In conclusion,  
328 our data support a recent call to "Regulate genome-edited products, not genome editing  
329 itself"<sup>50</sup>.

330

## 331 **METHODS**

### 332 **Plant Material and Growth Condition**

333 This study used the rice variety Nipponbare (*Oryza sativa* L. ssp. Japonica cv.  
334 Nipponbare). All plants were grown in growth chambers under controlled environmental  
335 conditions with a 16/8 h light/dark regime at 28°C and 60% relative humidity.

### 336 **Vector construction**

337 Plasmids encoding for Cas9 and a single sgRNA were generated by ligating annealed  
338 oligos with a 4 bp overhang into a *Bsal* digested backbone (either pZHY988 or pTX172)<sup>51</sup>,  
339 <sup>52</sup>. Plasmids with two sgRNAs were created by ligating pZHY988 with a 485 bp fragment,  
340 after digestion with *Bsal*. This 485 bp fragment contains two sgRNAs generated by  
341 overlap extension PCR<sup>52</sup>. All CRISPR-Cpf1 nuclease expression vectors were reported  
342 in our previous study<sup>14</sup>. The sequences of all primers used to construct vectors are shown  
343 in **Supplementary Table 5**.

### 344 **Rice stable transformation**

345 *Agrobacterium*-mediated rice transformation was performed as described in published  
346 protocols<sup>53</sup> with slight modification. The binary vectors were introduced into  
347 *Agrobacterium tumefaciens* strain EHA105 by the freeze-thaw method<sup>54</sup>. For rice  
348 transformation, dehusked seeds were sterilized with 70% ethanol for 1 min. Afterwards,  
349 seeds were washed five times with sterile water, then further sterilized for 15 minutes with  
350 a 2.5% sodium hypochlorite solution containing a drop of Tween 20. The washing and  
351 sterilization step were repeated, this time without addition of Tween. Seeds were then  
352 rinsed an additional five times before being dried on sterilized filter paper and cultured on  
353 solid medium at 28°C in a dark growth chamber for 2-3 weeks. Actively growing calli were  
354 collected for subculture at 28°C in the dark for 1-2 weeks. *Agrobacterium* cultures were  
355 collected and resuspended in liquid medium (OD<sub>600</sub>=0.06-0.1) containing 100 µM  
356 acetosyringone. Rice calli were immersed in the *Agrobacterium* suspension for 30 min,  
357 then dried on sterilized filter paper and co-cultured for three days on solid medium at 25°C  
358 in a dark growth chamber. The infected calli were moved to a sterile plastic bottle and

359 washed five times with sterile water to remove excessive *Agrobacterium*. After being dried  
360 on a sterilized filter paper, these calli were transferred onto screening medium at 28°C in  
361 a dark growth chamber for 5 weeks. During the screening stage, infected calli were  
362 transferred to fresh screening medium every two weeks. After the screening stage,  
363 actively growing calli were moved onto regenerative medium for regeneration at 28°C  
364 with a 16h light/8h dark cycle. After 3-4 weeks, transgenic seedlings were transferred to  
365 sterile plastic containers containing fresh solid medium and grown for 2-3 weeks before  
366 being transferred into soil. Transgenic rice plants were grown in a growth chamber at  
367 28°C with a 16h light/8h dark cycle.

### 368 **Mutagenesis analysis at target sites**

369 Genomic DNA was extracted from transgenic plants using the CTAB method<sup>55</sup>. The  
370 genomic region flanking the CRISPR target site for each gene was amplified and  
371 sequenced. Samples with heterozygous and biallelic mutations were decoded using  
372 CRISP-ID<sup>56</sup>.

### 373 **Whole genome sequencing and Data analysis**

374 For each sample, about 1 g of fresh leaves were collected from seedlings between five  
375 and six weeks old. DNA samples were extracted using the Plant Genome DNA Kit  
376 (Tiangen) as described by the manufacturer. All 69 samples were sequenced by Bionova  
377 (Beijing, China) using the Illumina X10 platform. Adapters were trimmed using SKEWER  
378 (v. 0.2.2)<sup>57</sup> and the Illumina TruSeq adapter. Cleaned reads were mapped to rice  
379 reference sequence TIGR7 (<http://rice.plantbiology.msu.edu/>)<sup>58</sup> with BWA (v. 0.7.15)  
380 software<sup>59</sup>. The Genome Analysis Toolkit (GATK)<sup>60</sup> was used to realign reads near indels  
381 and recalibrate base quality scores by following GATK best practices<sup>61</sup>. A known SNPs  
382 and indels database for GATK best practices was downloaded from Rice SNP-Seek  
383 Database (<http://snp-seek.irri.org/>)<sup>62</sup>. Whole genome SNVs were detected by LoFreq<sup>63</sup>,  
384 MuTect2<sup>64</sup> and VarScan2<sup>65</sup>. Whole genome indels were identified using MuTect2<sup>64</sup>,  
385 VarScan2 and Pindel<sup>66</sup>. Bedtools<sup>67</sup> and BCFtools<sup>68</sup> were used to process overlapping  
386 SNVs/indels. Off-target sites were predicted with CRISPOR<sup>30</sup> online and Cas-OFFinder  
387 software<sup>31</sup> by allowing up to 10 nt mismatch. Genome-wide map of mutations was plotted

388 with Circos software<sup>69</sup>. Structural variants and translocation events were analyzed by  
389 using TopHat2<sup>70</sup> with ‘—fusion-search’ parameter, DELLY<sup>71</sup> with default parameter and  
390 manually checking with IGV software<sup>72</sup>. The NCBI BLAST+ with ‘-task blastn-short’  
391 parameter was used for off-target mutations site analysis, which include mismatch,  
392 deletion and insertion. Reads mapping screenshots were from Golden Helix  
393 GenomeBrowse® visualization tool v2.1. Data processing and analyses were completed  
394 using R and Python. One T1 sample of Cas9-CC2 was excluded from analyses due to  
395 contamination of fungal DNA.

396

## 397 References

398

- 399 1. Jinek, M. et al. A programmable dual-RNA-guided DNA endonuclease in adaptive bacterial  
400 immunity. *Science* **337**, 816-821 (2012).
- 401 2. Jiang, W., Bikard, D., Cox, D., Zhang, F. & Marraffini, L.A. RNA-guided editing of bacterial  
402 genomes using CRISPR-Cas systems. *Nat Biotechnol* **31**, 233-239 (2013).
- 403 3. Hwang, W.Y. et al. Efficient genome editing in zebrafish using a CRISPR-Cas system. *Nat*  
404 *Biotechnol* **31**, 227-229 (2013).
- 405 4. Jinek, M. et al. RNA-programmed genome editing in human cells. *Elife* **2**, e00471 (2013).
- 406 5. Mali, P. et al. RNA-guided human genome engineering via Cas9. *Science* **339**, 823-826 (2013).
- 407 6. Cong, L. et al. Multiplex genome engineering using CRISPR/Cas systems. *Science* **339**, 819-823  
408 (2013).
- 409 7. Cho, S.W., Kim, S., Kim, J.M. & Kim, J.S. Targeted genome engineering in human cells with the  
410 Cas9 RNA-guided endonuclease. *Nat Biotechnol* **31**, 230-232 (2013).
- 411 8. Li, J.F. et al. Multiplex and homologous recombination-mediated genome editing in Arabidopsis  
412 and Nicotiana benthamiana using guide RNA and Cas9. *Nat Biotechnol* **31**, 688-691 (2013).
- 413 9. Shan, Q. et al. Targeted genome modification of crop plants using a CRISPR-Cas system. *Nat*  
414 *Biotechnol* **31**, 686-688 (2013).
- 415 10. Nekrasov, V., Staskawicz, B., Weigel, D., Jones, J.D. & Kamoun, S. Targeted mutagenesis in the  
416 model plant Nicotiana benthamiana using Cas9 RNA-guided endonuclease. *Nat Biotechnol* **31**,  
417 691-693 (2013).
- 418 11. Lowder, L.G. et al. A CRISPR/Cas9 toolbox for multiplexed plant genome editing and  
419 transcriptional regulation. *Plant Physiol* **169**, 971-985 (2015).
- 420 12. Mojica, F.J., Diez-Villasenor, C., Garcia-Martinez, J. & Almendros, C. Short motif sequences  
421 determine the targets of the prokaryotic CRISPR defence system. *Microbiology* **155**, 733-740  
422 (2009).
- 423 13. Zetsche, B. et al. Cpf1 is a single RNA-guided endonuclease of a class 2 CRISPR-Cas system. *Cell*  
424 **163**, 759-771 (2015).
- 425 14. Tang, X. et al. A CRISPR-Cpf1 system for efficient genome editing and transcriptional repression  
426 in plants. *Nat Plants* **3**, 17018 (2017).
- 427 15. Endo, A., Masafumi, M., Kaya, H. & Toki, S. Efficient targeted mutagenesis of rice and tobacco  
428 genomes using Cpf1 from Francisella novicida. *Sci Rep* **6**, 38169 (2016).

- 429 16. Fu, Y. et al. High-frequency off-target mutagenesis induced by CRISPR-Cas nucleases in human  
430 cells. *Nat Biotechnol* **31**, 822-826 (2013).
- 431 17. Tsai, S.Q. et al. GUIDE-seq enables genome-wide profiling of off-target cleavage by CRISPR-Cas  
432 nucleases. *Nat Biotechnol* **33**, 187-197 (2015).
- 433 18. Kim, D. et al. Genome-wide analysis reveals specificities of Cpf1 endonucleases in human cells.  
434 *Nat Biotechnol* **34**, 863-868 (2016).
- 435 19. Kleinstiver, B.P. et al. Genome-wide specificities of CRISPR-Cas Cpf1 nucleases in human cells.  
436 *Nat Biotechnol* **34**, 869-874 (2016).
- 437 20. Feng, Z. et al. Multigeneration analysis reveals the inheritance, specificity, and patterns of  
438 CRISPR/Cas-induced gene modifications in Arabidopsis. *Proceedings of the National Academy of  
439 Sciences of the United States of America* **111**, 4632-4637 (2014).
- 440 21. Zhang, H. et al. The CRISPR/Cas9 system produces specific and homozygous targeted gene  
441 editing in rice in one generation. *Plant Biotechnol J* **12**, 797-807 (2014).
- 442 22. Nekrasov, V. et al. Rapid generation of a transgene-free powdery mildew resistant tomato by  
443 genome deletion. *Sci Rep* **7**, 482 (2017).
- 444 23. Iyer, V. et al. Off-target mutations are rare in Cas9-modified mice. *Nat Methods* **12**, 479 (2015-  
445 05-28).
- 446 24. Schaefer, K.A. et al. Unexpected mutations after CRISPR-Cas9 editing in vivo. *Nature methods*  
447 **14**, 547-548 (2017).
- 448 25. Yang, N. et al. Contributions of Zea mays subspecies mexicana haplotypes to modern maize. *Nat  
449 Commun* **8**, 1874 (2017).
- 450 26. Ossowski, S. et al. The rate and molecular spectrum of spontaneous mutations in Arabidopsis  
451 thaliana. *Science* **327**, 92-94 (2010).
- 452 27. Yang, S. et al. Parent-progeny sequencing indicates higher mutation rates in heterozygotes.  
453 *Nature* **523**, 463-467 (2015).
- 454 28. Evans, D.A. Somaclonal variation--genetic basis and breeding applications. *Trends in genetics :*  
455 *TIG* **5**, 46-50 (1989).
- 456 29. Wei, F.J. et al. Somaclonal variation does not preclude the use of rice transformants for genetic  
457 screening. *Plant J* **85**, 648-659 (2016).
- 458 30. Haeussler, M. et al. Evaluation of off-target and on-target scoring algorithms and integration  
459 into the guide RNA selection tool CRISPOR. *Genome Biol* **17**, 148 (2016).
- 460 31. Bae, S., Park, J. & Kim, J.S. Cas-OFFinder: a fast and versatile algorithm that searches for  
461 potential off-target sites of Cas9 RNA-guided endonucleases. *Bioinformatics* **30**, 1473-1475  
462 (2014).
- 463 32. Hsu, P.D. et al. DNA targeting specificity of RNA-guided Cas9 nucleases. *Nat Biotechnol* (2013).
- 464 33. Meng, X. et al. Robust genome editing of CRISPR-Cas9 at NAG PAMs in rice. *Sci China Life Sci*  
465 (2017).
- 466 34. Lin, Y. et al. CRISPR/Cas9 systems have off-target activity with insertions or deletions between  
467 target DNA and guide RNA sequences. *Nucleic Acids Res* **42**, 7473-7485 (2014).
- 468 35. Frock, R.L. et al. Genome-wide detection of DNA double-stranded breaks induced by engineered  
469 nucleases. *Nat Biotechnol* **33**, 179-186 (2015).
- 470 36. Veres, A. et al. Low incidence of off-target mutations in individual CRISPR-Cas9 and TALEN  
471 targeted human stem cell clones detected by whole-genome sequencing. *Cell Stem Cell* **15**, 27-  
472 30 (2014).
- 473 37. Smith, C. et al. Whole-genome sequencing analysis reveals high specificity of CRISPR/Cas9 and  
474 TALEN-based genome editing in human iPSCs. *Cell Stem Cell* **15**, 12-13 (2014).
- 475 38. Waltz, E. CRISPR-edited crops free to enter market, skip regulation. *Nat Biotechnol* **34**, 582  
476 (2016).

- 477 39. Ran, F.A. et al. Double nicking by RNA-guided CRISPR Cas9 for enhanced genome editing  
478 specificity. *Cell* **154**, 1380-1389 (2013).
- 479 40. Kleinstiver, B.P. et al. High-fidelity CRISPR-Cas9 nucleases with no detectable genome-wide off-  
480 target effects. *Nature* **529**, 490-495 (2016).
- 481 41. Slaymaker, I.M. et al. Rationally engineered Cas9 nucleases with improved specificity. *Science*  
482 **351**, 84-88 (2016).
- 483 42. Chen, J.S. et al. Enhanced proofreading governs CRISPR-Cas9 targeting accuracy. *Nature* **550**,  
484 407-410 (2017).
- 485 43. Tsai, S.Q. et al. Dimeric CRISPR RNA-guided FokI nucleases for highly specific genome editing.  
486 *Nat Biotechnol* **32**, 569-576 (2014).
- 487 44. Guilinger, J.P., Thompson, D.B. & Liu, D.R. Fusion of catalytically inactive Cas9 to FokI nuclease  
488 improves the specificity of genome modification. *Nat Biotechnol* **32**, 577-582 (2014).
- 489 45. Fu, Y., Sander, J.D., Reyon, D., Cascio, V.M. & Joung, J.K. Improving CRISPR-Cas nuclease  
490 specificity using truncated guide RNAs. *Nat Biotechnol* **32**, 279-284 (2014).
- 491 46. Kim, S., Kim, D., Cho, S.W., Kim, J. & Kim, J.S. Highly efficient RNA-guided genome editing in  
492 human cells via delivery of purified Cas9 ribonucleoproteins. *Genome Res* **24**, 1012-1019 (2014).
- 493 47. Cameron, P. et al. Mapping the genomic landscape of CRISPR-Cas9 cleavage. *Nature methods*  
494 **14**, 600-606 (2017).
- 495 48. Kim, D. et al. Digenome-seq: genome-wide profiling of CRISPR-Cas9 off-target effects in human  
496 cells. *Nature methods* **12**, 237-243 (2015).
- 497 49. Tsai, S.Q. et al. CIRCLE-seq: a highly sensitive in vitro screen for genome-wide CRISPR-Cas9  
498 nuclease off-targets. *Nature methods* **14**, 607-614 (2017).
- 499 50. Carroll, D., Van Eenennaam, A.L., Taylor, J.F., Seger, J. & Voytas, D.F. Regulate genome-edited  
500 products, not genome editing itself. *Nat Biotechnol* **34**, 477-479 (2016).
- 501 51. Tang, X. et al. A single transcript CRISPR-Cas9 system for efficient genome editing in plants. *Mol*  
502 *Plant* **9**, 1088-1091 (2016).
- 503 52. Zhou, J. et al. CRISPR-Cas9 based genome editing reveals new insights into MicroRNA function  
504 and regulation in rice. *Front Plant Sci* **8**, 1598 (2017).
- 505 53. Hiei, Y., Ohta, S., Komari, T. & Kumashiro, T. Efficient transformation of rice (*Oryza sativa* L.)  
506 mediated by *Agrobacterium* and sequence analysis of the boundaries of the T-DNA. *Plant J* **6**,  
507 271-282 (1994).
- 508 54. Weigel, D. & Glazebrook, J. Transformation of *Agrobacterium* using the freeze-thaw method.  
509 *CSH Protoc* **2006** (2006).
- 510 55. Stewart, C.N., Jr. & Via, L.E. A rapid CTAB DNA isolation technique useful for RAPD fingerprinting  
511 and other PCR applications. *Biotechniques* **14**, 748-750 (1993).
- 512 56. Dehairs, J., Talebi, A., Cherifi, Y. & Swinnen, J.V. CRISP-ID: decoding CRISPR mediated indels by  
513 Sanger sequencing. *Scientific reports* **6**, 28973 (2016).
- 514 57. Jiang, H., Lei, R., Ding, S.W. & Zhu, S. Skewer: a fast and accurate adapter trimmer for next-  
515 generation sequencing paired-end reads. *BMC Bioinformatics* **15**, 182 (2014).
- 516 58. Kawahara, Y. et al. Improvement of the *Oryza sativa* Nipponbare reference genome using next  
517 generation sequence and optical map data. *Rice* **6** (2013).
- 518 59. Li, H. in ArXiv e-prints, Vol. 1303 (2013).
- 519 60. McKenna, A. et al. The Genome Analysis Toolkit: a MapReduce framework for analyzing next-  
520 generation DNA sequencing data. *Genome Res* **20**, 1297-1303 (2010).
- 521 61. Van der Auwera, G.A. et al. From FastQ data to high confidence variant calls: the Genome  
522 Analysis Toolkit best practices pipeline. *Curr Protoc Bioinformatics* **43**, 11 10 11-33 (2013).
- 523 62. Mansueto, L. et al. Rice SNP-seek database update: new SNPs, indels, and queries. *Nucleic Acids*  
524 *Res* **45**, D1075-D1081 (2017).



- 525 63. Wilm, A. et al. LoFreq: a sequence-quality aware, ultra-sensitive variant caller for uncovering  
526 cell-population heterogeneity from high-throughput sequencing datasets. *Nucleic Acids Res* **40**,  
527 11189-11201 (2012).
- 528 64. Cibulskis, K. et al. Sensitive detection of somatic point mutations in impure and heterogeneous  
529 cancer samples. *Nat Biotechnol* **31**, 213-219 (2013).
- 530 65. Koboldt, D.C. et al. VarScan 2: somatic mutation and copy number alteration discovery in cancer  
531 by exome sequencing. *Genome Res* **22**, 568-576 (2012).
- 532 66. Ye, K., Schulz, M.H., Long, Q., Apweiler, R. & Ning, Z. Pindel: a pattern growth approach to detect  
533 break points of large deletions and medium sized insertions from paired-end short reads.  
534 *Bioinformatics* **25**, 2865-2871 (2009).
- 535 67. Quinlan, A.R. BEDTools: the swiss-army tool for genome feature analysis. *Curr Protoc*  
536 *Bioinformatics* **47**, 11 12 11-34 (2014).
- 537 68. Li, H. A statistical framework for SNP calling, mutation discovery, association mapping and  
538 population genetical parameter estimation from sequencing data. *Bioinformatics* **27**, 2987-2993  
539 (2011).
- 540 69. Krzywinski, M. et al. Circos: an information aesthetic for comparative genomics. *Genome Res* **19**,  
541 1639-1645 (2009).
- 542 70. Kim, D. et al. TopHat2: accurate alignment of transcriptomes in the presence of insertions,  
543 deletions and gene fusions. *Genome Biol* **14**, R36 (2013).
- 544 71. Rausch, T. et al. DELLY: structural variant discovery by integrated paired-end and split-read  
545 analysis. *Bioinformatics* **28**, i333-i339 (2012).
- 546 72. Thorvaldsdottir, H., Robinson, J.T. & Mesirov, J.P. Integrative Genomics Viewer (IGV): high-  
547 performance genomics data visualization and exploration. *Brief Bioinform* **14**, 178-192 (2013).

548

## 549 **ACKNOWLEDGEMENTS**

550 This work was supported by the National Science Foundation of China (31330017 and  
551 31771486) and the Sichuan Youth Science and Technology Foundation (2017JQ0005)  
552 to Y.Z. This work was also supported by grants including the National Transgenic Major  
553 Project (2018ZX08022001-003) to Y.Z., and T.Z., the Jiangsu Specially-Appointed  
554 Professor and the Priority Academic Program Development of Jiangsu Higher Education  
555 Institutions (PAPD) to T.Z., and startup funds provided by University of Maryland to Y.Q.

556

## 557 **AUTHOR CONTRIBUTIONS**

558 Y.Z. proposed the project. Y.Q., T.Z., and Y.Z. designed the experiments. X.T., J.Z., D.Z.,  
559 and A.M. generated CRISPR-Cas nuclease Vectors. X.T., J.Z., L.T., X.X., D.Z., and X.Z.  
560 generated stable transgenic rice and identified the rice mutants. X.T., J.Z., Q.R., Z.Z.,  
561 B.L., and X.Z. prepared samples for WGS and confirmed WGS results with Sanger

562 sequencing. G.L., Q.Y., Z.G., and T.Z. performed WGS data analysis. Y.Q., T.Z., and Y.Z.  
563 analyzed the data and wrote the manuscript. All authors participated in discussion and  
564 revision of the manuscript.

565

## 566 **COMPETING FINANCIAL INTERESTS**

567 The authors declare no competing financial interests.

568

## 569 **FIGURE LEGENDS**

570 **Figure 1. Experimental design and work flow.** (a) Genome editing efficiency at  
571 selected 12 Cas9 and 3 Cpf1 target sites in T0 rice plants. The X-axis shows the names  
572 of sgRNAs and crRNAs which are denoted as Cas9-A to Cas9-K and Cpf1-A to Cpf1-C.  
573 The numbers of T0 and/or T1 lines that are subjected to whole-genome sequencing  
574 (WGS) are indicated. The Y-axis shows genome editing frequencies calculated based on  
575 genotyping data in T0 generation. \*Cas9-J and Cas9-K samples each express a dual-  
576 sgRNA construct, targeting two genes simultaneously. (b) Selection of plants for WGS.  
577 Left: four groups of controls are included for assessing different background mutations.  
578 Middle: three generations of wild type plants are included for assessing parent-progeny  
579 spontaneous mutations. Right: Multiple T0 and T1 lines edited by Cas9 and Cpf1 are  
580 chosen for assessing off-targeting by WGS. (c) Workflow of whole-genome detection of  
581 SNV and indel mutations. SNV analysis involves using three computer programs: LoFreq,  
582 VarScan2 and MuTect2. Indel analysis also involves using three programs: VarScan2,  
583 MuTect2 and Pindel.

584

585 **Figure 2. Genome-wide analysis of spontaneous mutations and mutations caused**  
586 **by tissue culture and Agrobacterium mediated transformation.** (a, b) Average  
587 numbers of SNVs and indels detected in 3 generations of wild type plants and 4 types of  
588 tissue culture-related control plants. Error bars indicate s.e.m. (c, d) Annotation of  
589 genome-wide distribution of mutations found in all control samples: WT, tissue culture  
590 only, Agro-infection, Cas9 backbone and Cpf1 backbone. TE, transposable element. CDS,

591 coding sequence. Error bars indicate s.e.m.

592

593 **Figure 3. Detailed analysis of mutations at Cas9 or Cpf1- edited T0 plants. (a, b)**

594 Average numbers of SNVs and indels detected in 26 T0 plants edited by Cas9 or Cpf1.

595 **(c, d)** Average numbers of SNVs and indels in edited T0 plants with different numbers of

596 T-DNA insertions. **(e, f)** Average numbers of SNVs and indels in Cas9-edited T0 plants

597 expressing one or two sgRNAs (in Cas9-J and Cas9-K). **(g, h)** Pearson correlation

598 between on-target editing frequency and the numbers of SNVs or indels mutations in

599 Cas9 and Cpf1-edited T0 plants. Error bars in **a-f** indicate s.e.m.

600

601 **Figure 4. Analysis and identification of potential off-target sites in T0 lines. (a)**

602 Number of off-target sites identified in replicated T0 plants vs the number of all off-target

603 sites that are predicted by Cas-OFFinder and CRISPOR with allowing up to 3 nt mismatch

604 for all 15 Cas9 or Cpf1 target sites. **(b)** Identification of shared SNVs and indels between

605 replicated T0 plants. **(c)** Potential off-target sites identified in both Cas9-J T0 samples

606 (above the red dashed line) and only in one T0 sample (below the red dashed line). **(d)**

607 Off-target mutations identified by WGS at off-target sites in both Cas9-J T0 samples

608 (above the red dashed line) and only in one T0 sample (below the red dashed line). **(e)**

609 Potential off-target sites identified in Cas9-E samples based on shared mutations in two

610 T0 plants. **(f)** Sequence analysis of the shared mutations in Cas9-E samples.

611

612 **Figure 5. Evaluate off-target effect of Cas9 and Cpf1 in T1 plants. (a,b)** Analysis of

613 new SNVs and indels in T1 plants. **(c, d)** Analysis of SNVs and indels in T1 plants that

614 carry (+) or do not carry (-) the Cas9 and sgRNA expression cassettes. **(e)** Allele

615 frequencies of SNVs and indels identified in all tissue culture related controls (tissue

616 culture and transformants with Cas9 and Cpf1 backbones), T0, T1 and WT plants. Above:

617 SNVs; Bottom: indels.

618

## 619 SUPPLEMENTARY FIGURE LEGENDS

620

621 **Supplementary Fig. 1 Non-mosaic mutations at target sites revealed by Sanger**

622 **sequencing in all Cas9 edited T0 lines chosen for WGS**

623

624 **Supplementary Fig. 2 Non-mosaic mutations at target sites revealed by Sanger**  
625 **sequencing in all Cpf1 edited T0 lines chosen for WGS**

626

627 **Supplementary Fig. 3 Venn diagram of SNVs and indels detected by multiple**  
628 **variant callers in WT plants for three consecutive generations**

629

630 **Supplementary Fig. 4 Venn diagram of SNVs and indels detected by multiple**  
631 **variant callers in four types of tissue culture related control samples**

632

633 **Supplementary Fig. 5 Genome-wide distribution of mutations from tissue culture**  
634 **only, Agro-infected, Cas9 backbone, Cpf1 backbone, Cas9 T0 and Cpf1 T0 samples.**

635

636 **Supplementary Fig. 6 Venn diagram of SNVs and indels detected by multiple**  
637 **variant callers in Cas9-edited T0 lines**

638

639 **Supplementary Fig. 7 Venn diagram of SNVs and indels detected by multiple**  
640 **variant callers in Cpf1-edited T0 lines**

641

642 **Supplementary Fig. 8 Mapped T-DNA insertion site for each T0 line.** T-DNA insertion  
643 sites are shown in black lines. Samples with more than 1 T-DNA insertion are marked in  
644 red.

645

646 **Supplementary Fig. 9 Alignment of top candidate off-target sites to the target sites**  
647 **based on WGS-discovered mutations in Cas9 T0 lines.** The putative off-target sites  
648 are aligned with the on-target sequences. They are identified based on meeting three  
649 criteria: (1) contain a PAM (NGG for Cas9), (2) allow up to 10 nt mismatches with the on-  
650 target sequences (20 nt for Cas9 and 23 nt for Cpf1) and (3) contain mutations in these  
651 sequences.

652

653 **Supplementary Fig. 10 Alignment of top candidate off-target sites to the target sites**  
654 **based on WGS-discovered mutations in Cpf1 T0 lines.** The putative off-target sites  
655 are aligned with the on-target sequences. They are identified based on meeting three  
656 criteria: (1) contain a PAM (TTTN for Cpf1), (2) allow up to 10 nt mismatches with the on-  
657 target sequences (20 nt for Cas9 and 23 nt for Cpf1) and (3) contain mutations in these  
658 sequences.

659  
660 **Supplementary Fig. 11 Examples of mutation sites snapshot from Genome Browser**

661  
662 **Supplementary Fig. 12 Germline transmitted mutations at target sites revealed by**  
663 **Sanger sequencing in all Cas9 edited T1 lines**

664  
665 **Supplementary Fig. 13 Germline transmitted mutations at target sites revealed by**  
666 **Sanger sequencing in all Cpf1 edited T1 lines**

667  
668 **Supplementary Fig. 14 Venn diagram of SNVs and indels detected by multiple**  
669 **variant callers in Cas9 T1 lines**

670  
671 **Supplementary Fig. 15 Venn diagram of SNVs and indels detected by multiple**  
672 **variant callers in Cpf1 T1 lines**

673  
674 **Supplementary Fig. 16 Analysis of mutations found in Cas9 and Cpf1 T0 and T1**  
675 **lines.** Occurrence of SNV and Indel counts are calculated per 1 million base pairs (Mb)  
676 with five genome annotation units (Gene, TE, Repeats, CDS and Introns) for six different  
677 sample types. Note for the mutations identified in T1 plants were broken into two groups:  
678 those inherited from T0 plants and new mutations generated *de novo*. The average  
679 numbers of SNVs and indels of biological replicates are shown. Error bars indicate s.e.m.

680  
681 **Supplementary Fig. 17 Genome-wide distribution of spontaneous (new) mutations**  
682 **discovered in WT across two generations as well as in Cas9 and Cpf1 T1 lines.**

683

684 **Supplementary Fig. 18 SNV rates and types in different treatments or generations.**

685 Mutation rates of detected SNVs of all T0 and T1 plants. Control includes four control  
686 sample types: tissue culture only, Agro transformation, Cas9 backbone and Cpf1  
687 backbone. Complementary mutations, such as A>C and T>G, are pooled.

688

689 **SUPPLEMENTARY TABLES**

690 **Supplementary Table 1. Summary of all samples and target-site genotyping**  
691 **results**

692 **Supplementary Table 2. Summary and statistics of whole genome sequencing**

693 **Supplementary Table 3. Empirically validated off-target sites vs Cas-OFFinder or**  
694 **CRISPOR-predicted off-target sites**

695 **Supplementary Table 4. Validated mutations by Sanger sequencing**

696 **Supplementary Table 5. List of other oligos used in this study**

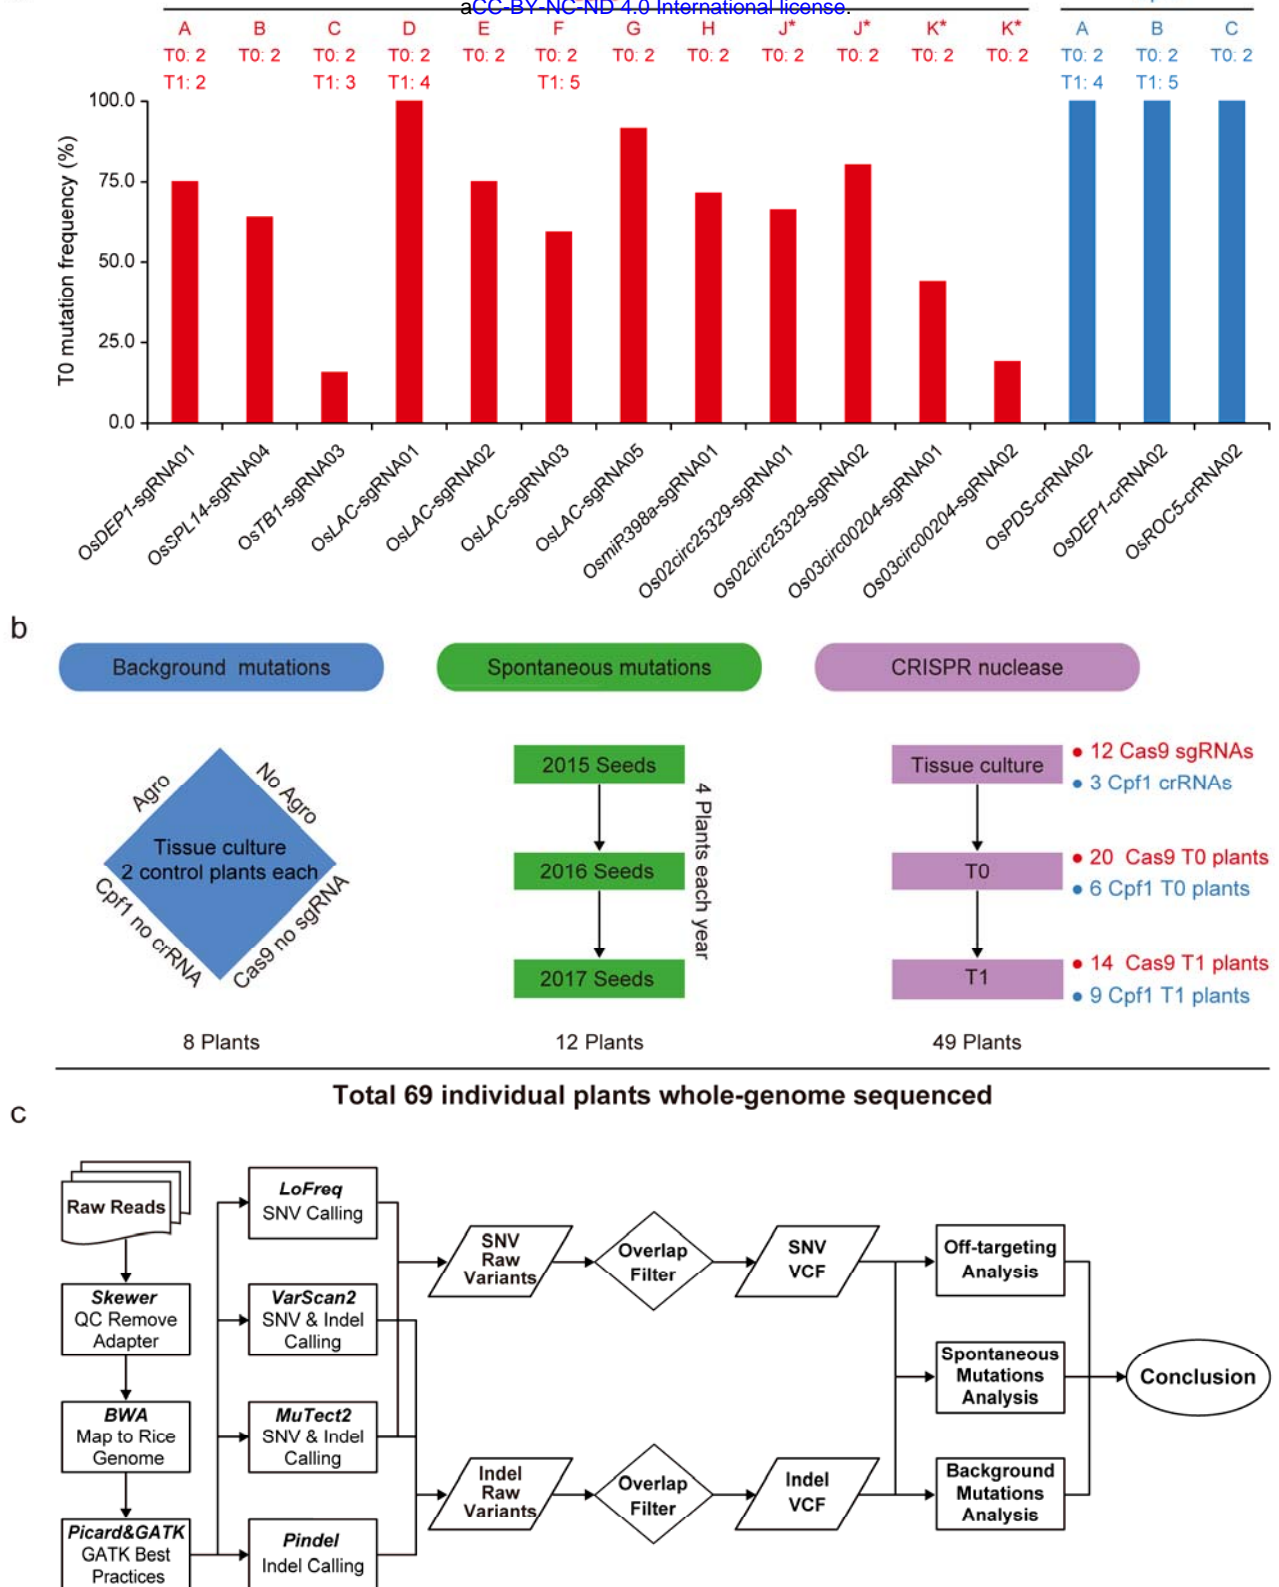

Figure 1. Experimental design and work flow

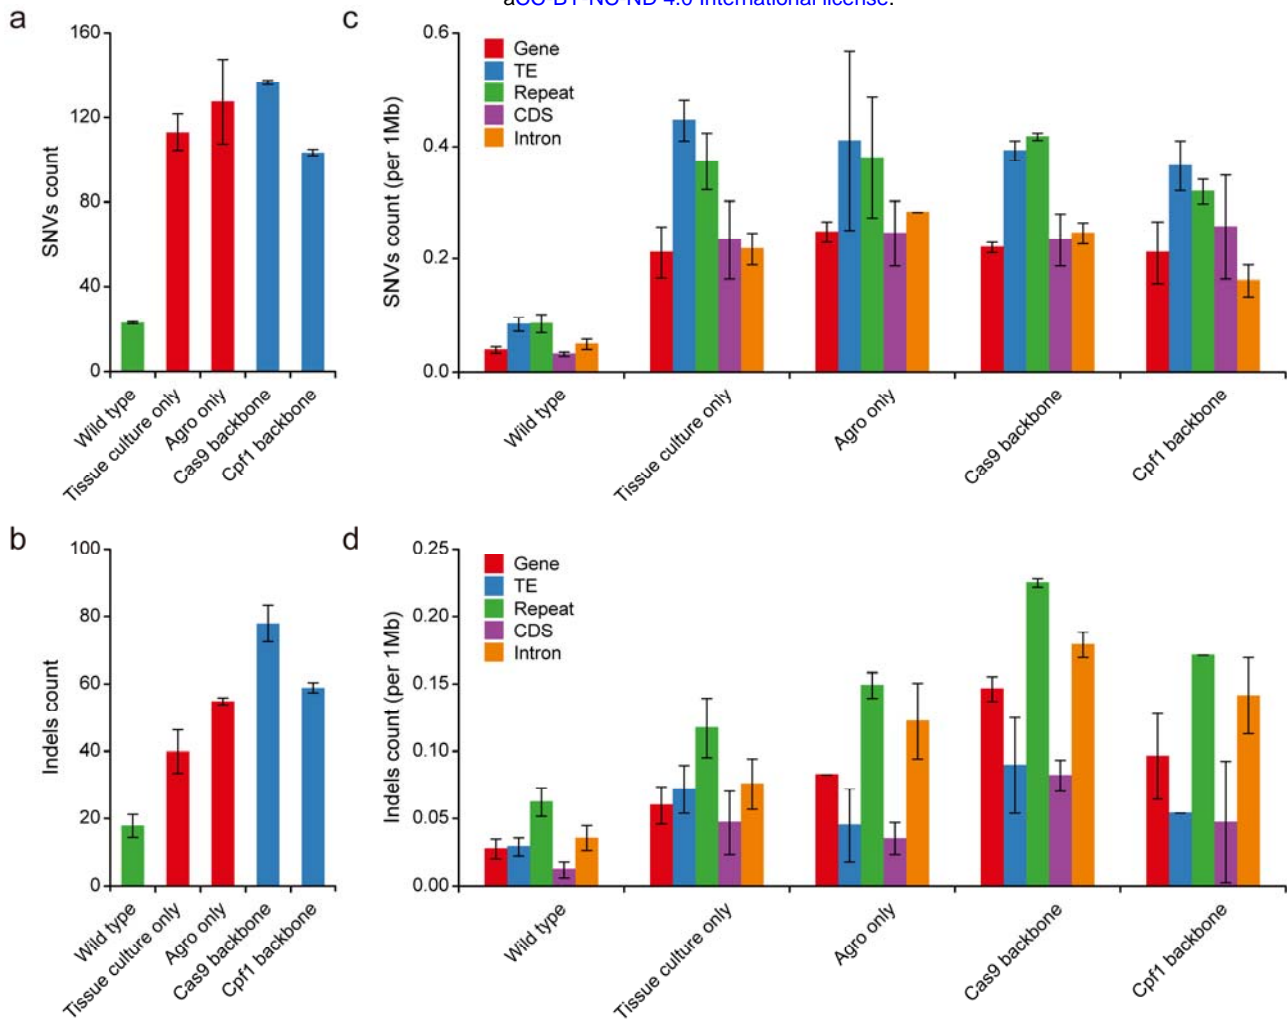

Figure 2. Genome-wide analysis of mutagenic effects of tissue culture and Agrobacterium mediated transformation



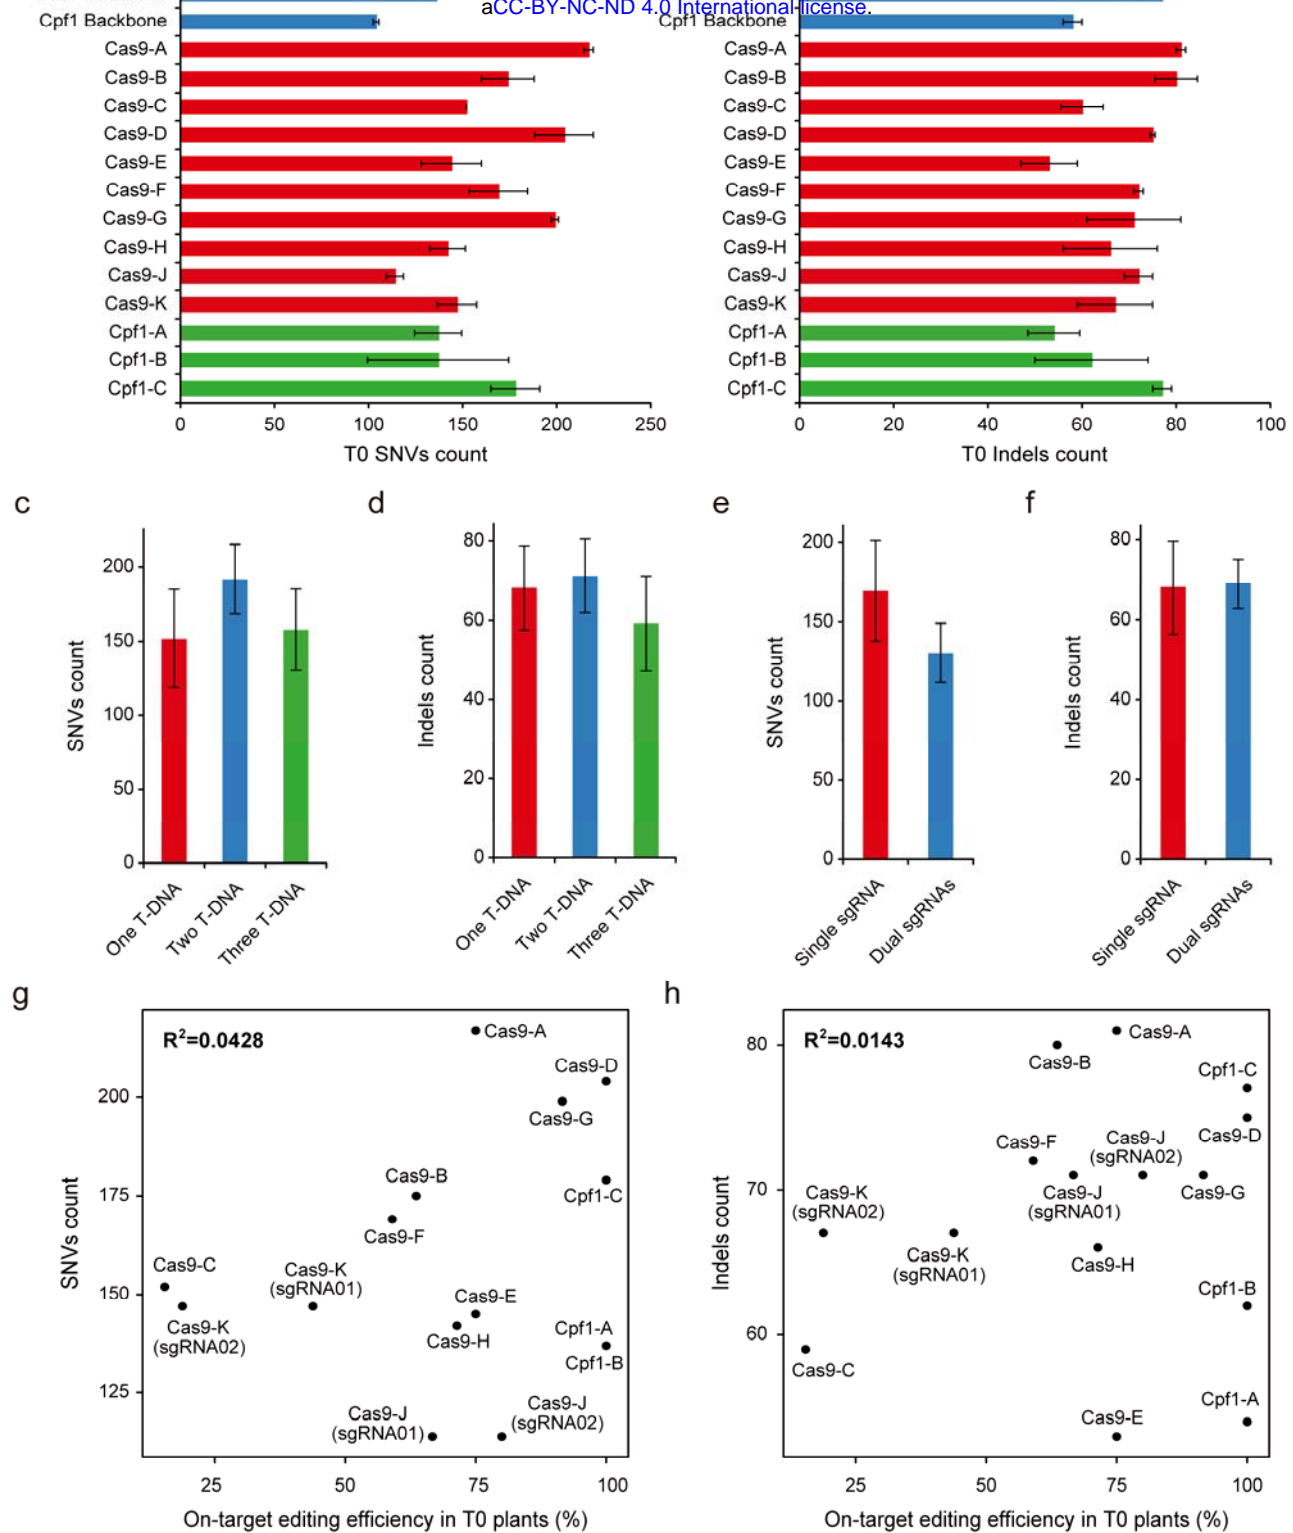

Figure 3. Detailed analysis of mutations at Cas9 or Cpf1- edited T0 plants.

**a** Off target sites: WGS identified vs computer predicted based on different numbers of nucleotide mismatches  
 bioRxiv preprint doi: <https://doi.org/10.1101/292086>; this version posted March 30, 2018. The copyright holder for this preprint (which was not certified by peer review) is the author/funder, who has granted bioRxiv a license to display the preprint in perpetuity. It is made available under aCC-BY-NC-ND 4.0 International license.

| Nucleotide mismatch | Off target sites: WGS identified vs computer predicted based on different numbers of nucleotide mismatches |     |     |      |     |     |     |     |     |      |      |     |     |     |     |     |
|---------------------|------------------------------------------------------------------------------------------------------------|-----|-----|------|-----|-----|-----|-----|-----|------|------|-----|-----|-----|-----|-----|
|                     | 0/0                                                                                                        | 0/0 | 0/0 | 0/1  | 0/1 | 0/0 | 0/0 | 0/0 | 0/0 | 7/12 | 0/0  | 0/0 | 0/0 | 0/0 | 0/0 | 0/0 |
| 1                   | T0 line 1                                                                                                  | 0/0 | 0/0 | 0/0  | 0/1 | 0/1 | 0/0 | 0/0 | 0/0 | 0/0  | 7/12 | 0/0 | 0/0 | 0/0 | 0/0 | 0/0 |
|                     | T0 line 2                                                                                                  | 0/0 | 0/0 | 0/0  | 0/1 | 0/1 | 0/0 | 0/0 | 0/0 | 6/12 | 0/0  | 0/0 | 0/0 | 0/0 | 0/0 | 0/0 |
| 2                   | T0 line 1                                                                                                  | 0/1 | 0/0 | 0/1  | 0/2 | 0/2 | 0/2 | 0/1 | 0/0 | 8/21 | 0/0  | 0/0 | 0/0 | 0/0 | 0/0 | 0/0 |
|                     | T0 line 2                                                                                                  | 0/1 | 0/0 | 0/1  | 0/2 | 0/2 | 0/2 | 0/1 | 0/0 | 8/21 | 0/0  | 0/0 | 0/0 | 0/0 | 0/0 | 0/0 |
| 3                   | T0 line 1                                                                                                  | 0/8 | 0/3 | 0/16 | 0/4 | 0/6 | 0/2 | 0/4 | 0/0 | 8/42 | 0/3  | 0/1 | 0/0 | 0/0 | 0/0 | 0/0 |
|                     | T0 line 2                                                                                                  | 0/8 | 0/3 | 0/16 | 0/4 | 0/6 | 0/2 | 0/4 | 0/0 | 8/42 | 0/3  | 0/1 | 0/0 | 0/0 | 0/0 | 0/0 |

**b** Shared mutations in T0 replicates

| Sample | Cas9-A | Cas9-B | Cas9-C | Cas9-D | Cas9-E | Cas9-F | Cas9-G | Cas9-H | Cas9-J | Cas9-K | Cpf1-A | Cpf1-B | Cpf1-C |
|--------|--------|--------|--------|--------|--------|--------|--------|--------|--------|--------|--------|--------|--------|
| SNVs   | 0      | 0      | 0      | 0      | 7      | 0      | 0      | 0      | 0      | 0      | 0      | 0      | 0      |
| Indels | 0      | 0      | 0      | 0      | 3      | 0      | 0      | 0      | 7      | 0      | 0      | 0      | 0      |

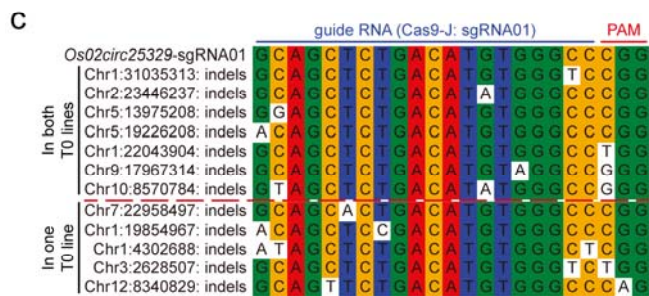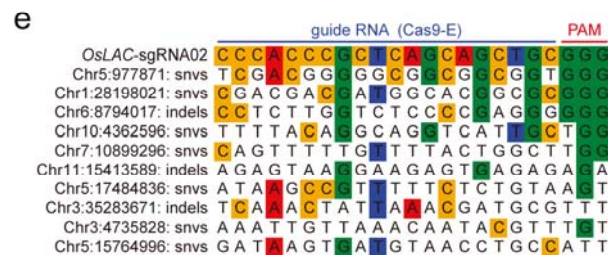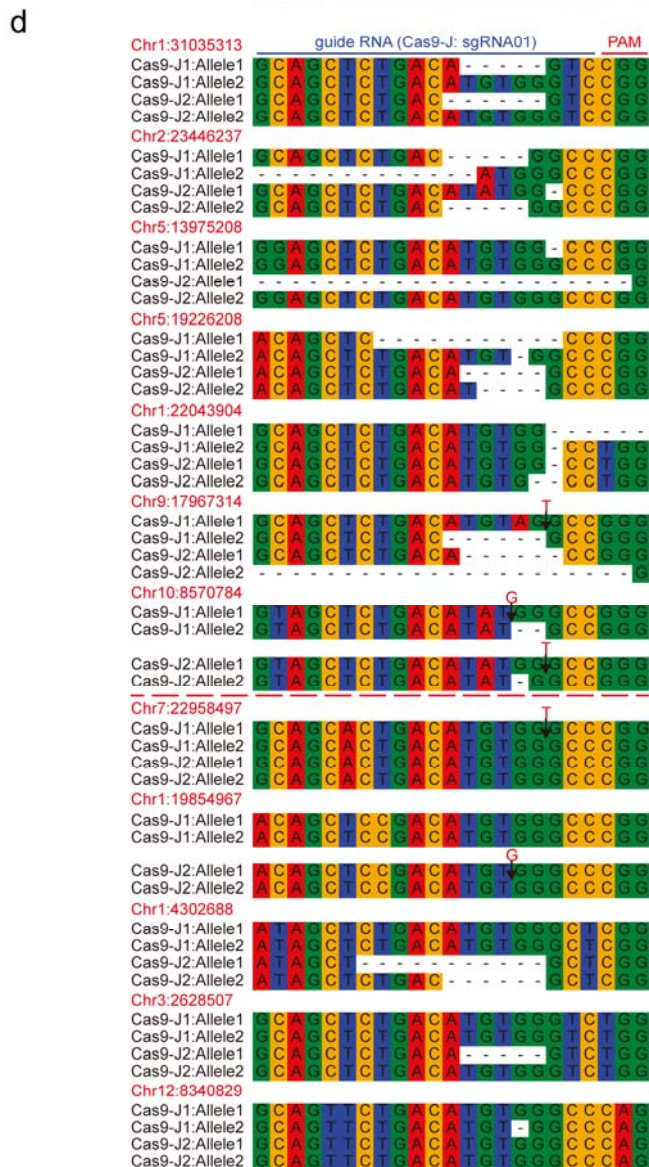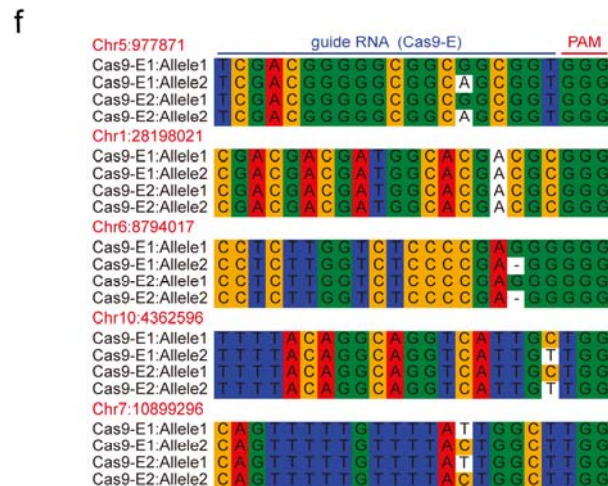

Figure 4. Identification and analysis of potential off-target sites.

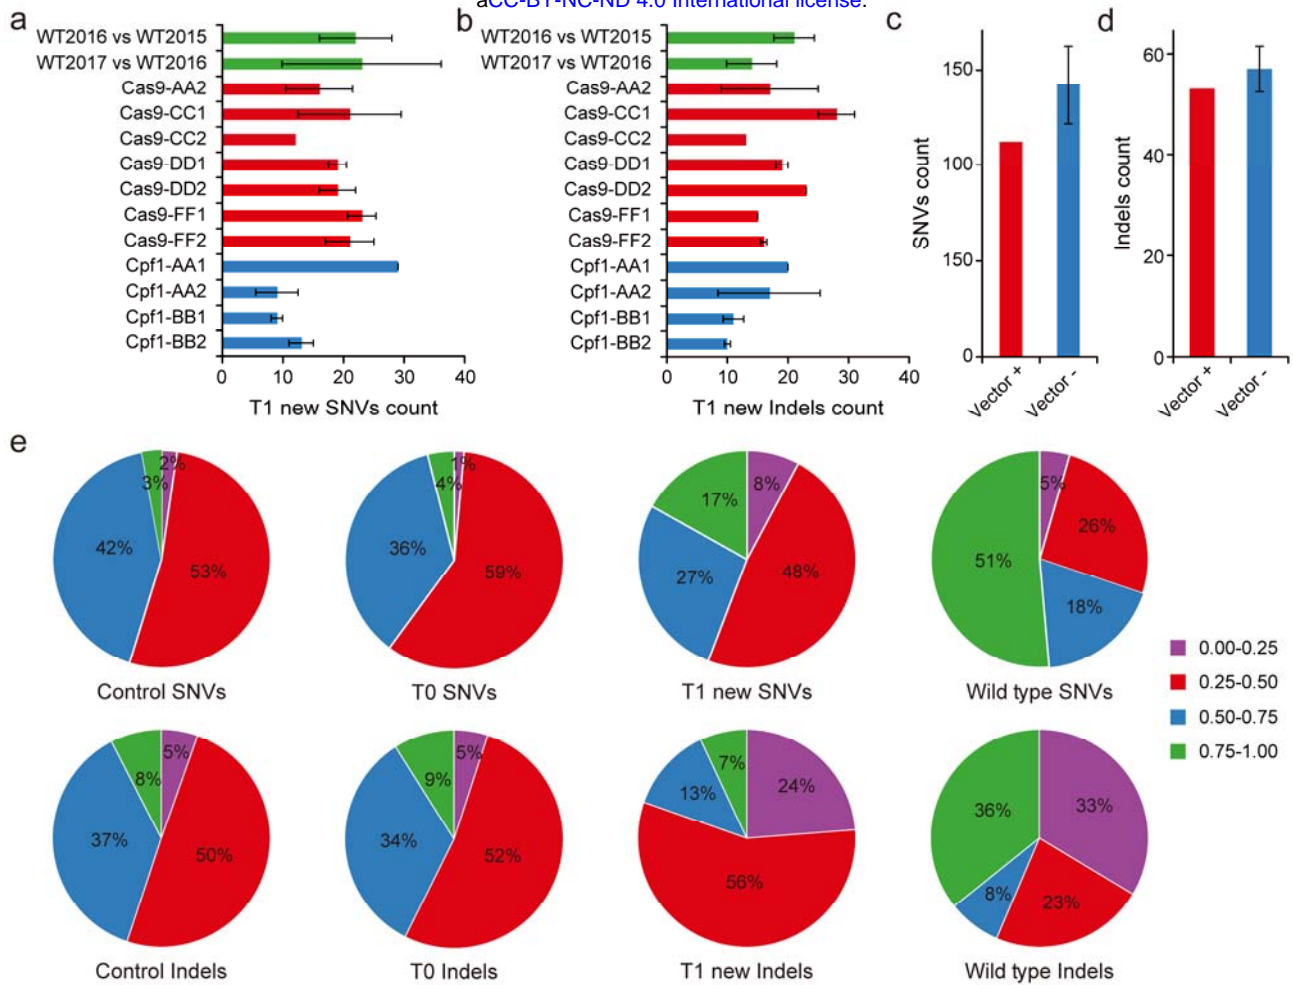

Figure 5. Evaluate off-target effects of Cas9 and Cpf1 in T1 plants.
